# Supplementary material for: Preparation of phosphorus-doped MnxCd1−xS with boosted photocatalytic hydrogen evolution from pure water
Source: Royal Society of Chemistry journal article supplement (doi:10.1039/d1se01361k), 2021-01-01
Supplement: d1se01361k1.pdf [file d1se01361k1.pdf]

**The preparation of phosphorus doped  $Mn_xCd_{1-x}S$  with boosted photocatalytic  
hydrogen evolution from pure water**

Xianyu Meng <sup>a</sup>, Lei Shi <sup>a\*</sup>, Xueya Dai<sup>b</sup>, Shuo Zhang <sup>a</sup>, Gang Liu <sup>a</sup>, Wei Qi <sup>b\*</sup>

a: School of Petrochemical Engineering, Liaoning Petrochemical University, Fushun  
113001, China

b: Shenyang National Laboratory for Materials Science, Institute of Metal Research,  
Chinese Academy of Sciences, Shenyang, 110016, China

\*Corresponding author: Lei Shi, [shilei\\_hit@qq.com](mailto:shilei_hit@qq.com); Wei Qi, [wqi@imr.ac.cn](mailto:wqi@imr.ac.cn)

## **Characterizations**

X-ray diffraction (XRD) patterns of all resultant photocatalysts were characterized on a Bruker D8 Advance X-ray diffractometer. X-ray photoelectron spectroscopy (XPS) was measured on Thermo Fisher Scientific Escalab 250. The features of photocatalysts were observed by scanning electron microscope (SEM, HITACHI SU8010). JEM-2100F transmission electron microscope (TEM) was used to characterize the microtopographies of photocatalysts. The light response property of as-obtained photocatalysts was characterized on An Agilent Cary 5000 UV-vis spectrometer. The photoluminescence spectra (PL) were recorded on an Agilent Cary Eclipse spectrometer. Time resolved PL decay profiles were recorded on an Edinburg Instruments FLS1000 spectrofluorometer. N<sub>2</sub> adsorption/desorption isotherms and pore size distribution curves were measured by Quantachrome Autosorb-IQ2-MP analyzer

## **Photocatalytic evaluation and Characterizations**

A series of prepared samples were evaluated for hydrogen evolution under the visible light irradiation to investigate the photocatalytic activity. The experiments were performed in a Pyrex top-irradiation reaction vessel connected to a sealed glass gas-circulation system. 30 mg photocatalyst and 50 mL water were added into the vessel and Pt as co-catalyst (2 wt%) was in situ photo-deposited on the catalyst by using H<sub>2</sub>PtCl<sub>6</sub> as a precursor to enhance the effect of photocatalytic hydrogen evolution. The temperature of the whole system was maintained at 6 °C with

circulated cooling water, and the system was deoxygenated with Ar several times to remove the air prior to the visible light irradiation and then irradiated by a 300 W Xe lamp with a UV-cutoff filter ( $\lambda > 400$  nm) and 15 A working current. The amounts of H<sub>2</sub> production were measured by a TCD at a regular time. In order to explore the detailed description of photocatalytic H<sub>2</sub> production performance, the e AQY of the 30 mg samples at 420 nm, 450 nm and 550 nm band-pass filters respectively, the AQY was estimated by the following equation:

$$\text{AQY [\%]} = \frac{2 \times \text{amount of H}_2 \text{ molecules evolved}}{\text{number of incident photons}} \times 100$$

### **Photoelectrochemical measurements**

The photocurrent and electrochemical impedance spectra measurements were performed at the electrochemical workstation CHI660E (Chenhua Instrument, Shanghai, China). Working with simple three electrodes, the working electrode (50 mg samples into 10 mg of PEG and 10  $\mu$ L adhesive Nafion stir into a paste evenly dispersed an amount of ethanol was prepared on FTO glass of 2 cm  $\times$  1.2 cm), reference electrode (Ag/AgCl) and Pt plate as the counter electrode was in the process of measuring the linear sweep voltammetry and transient photocurrent property. The whole test was carried out in a 2 M Na<sub>2</sub>SO<sub>4</sub> solution with a 300 W xenon lamp as the light source with a UV cut filter ( $\lambda > 400$  nm) and the current intensity was fixed at 15A.

### **Measurements of H<sub>2</sub>O<sub>2</sub>**

After hydrogen production, the liquid supernatant was centrifuged several times. 2 ml of the solution was added by 0.01 g KI, 0.02 g of starch, 0.04 g NaCl, 2 ml DI water and finally added 1mL HCl (1M). After 10-20 minutes of reaction, the solution was characterized on An Agilent Cary 5000 UV-vis spectrometer. The results are shown in Fig. S8.

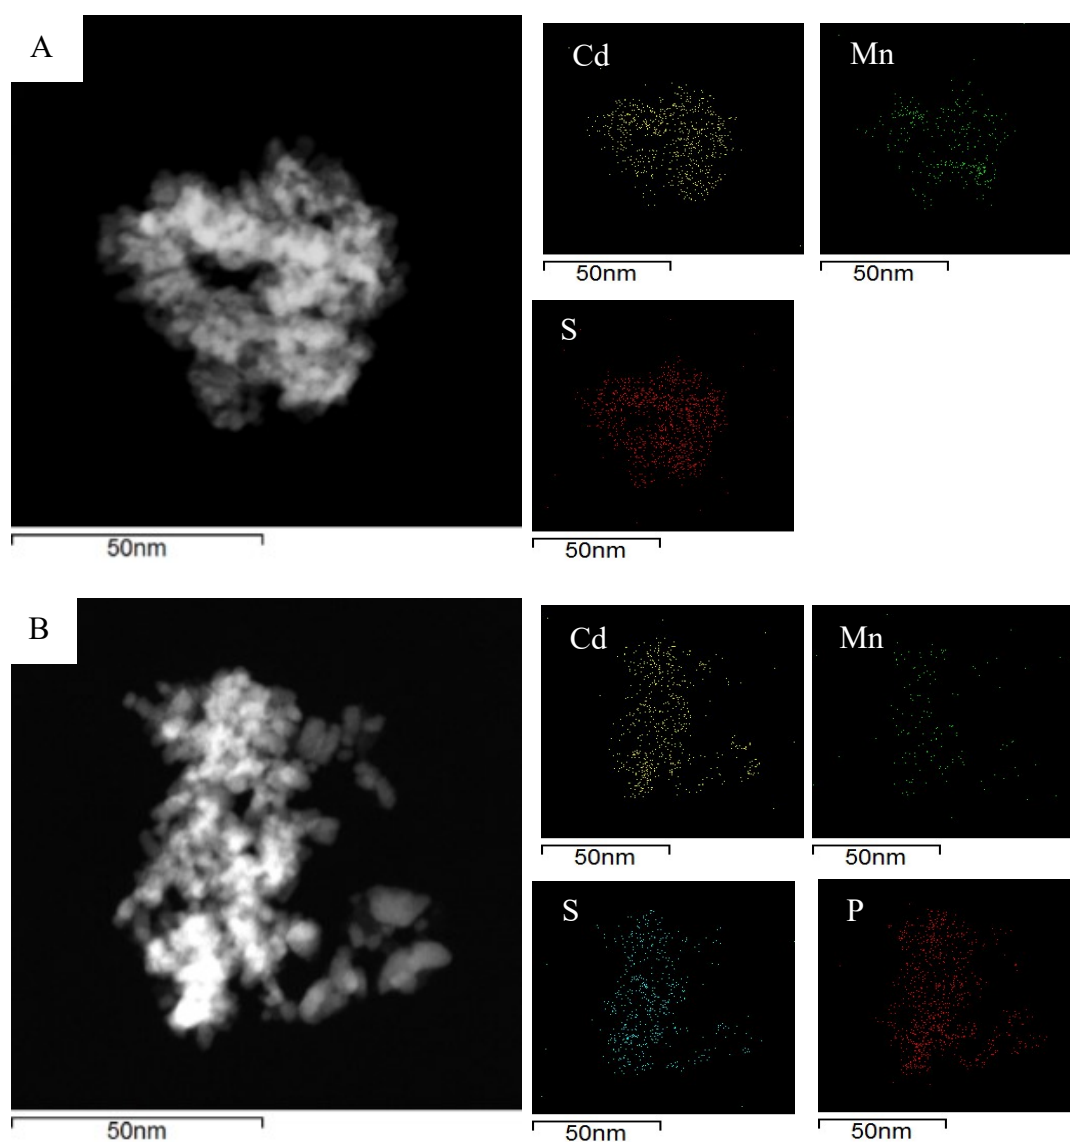

**Fig. S1** Element mapping of (A) Cd, Mn and S of  $\text{Mn}_{0.25}\text{Cd}_{0.75}\text{S}$  and (B) Cd, Mn, S and P of  $0.1\text{-P}/\text{Mn}_{0.25}\text{Cd}_{0.75}\text{S}$ .

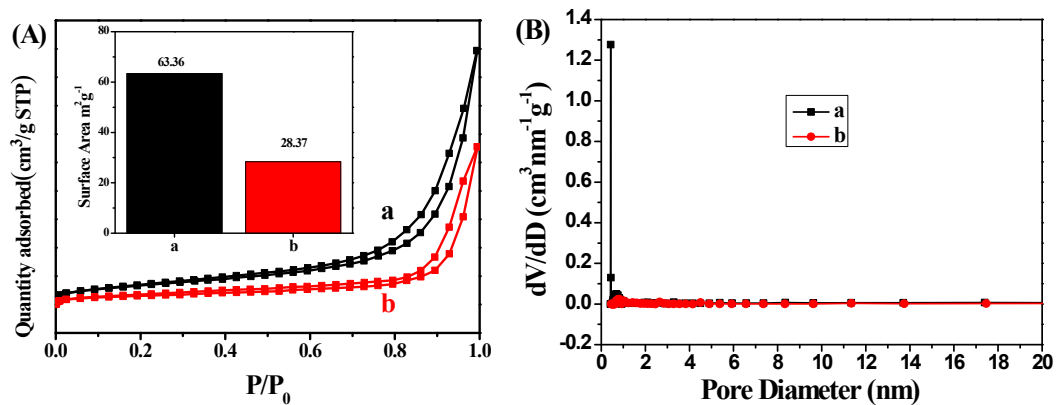

Fig. S2 (A)  $N_2$  adsorption-desorption isotherms and (B) pore size distribution curves of (a)  $Mn_{0.25}Cd_{0.75}S$ , (b) 0.1-P/ $Mn_{0.25}Cd_{0.75}S$ .

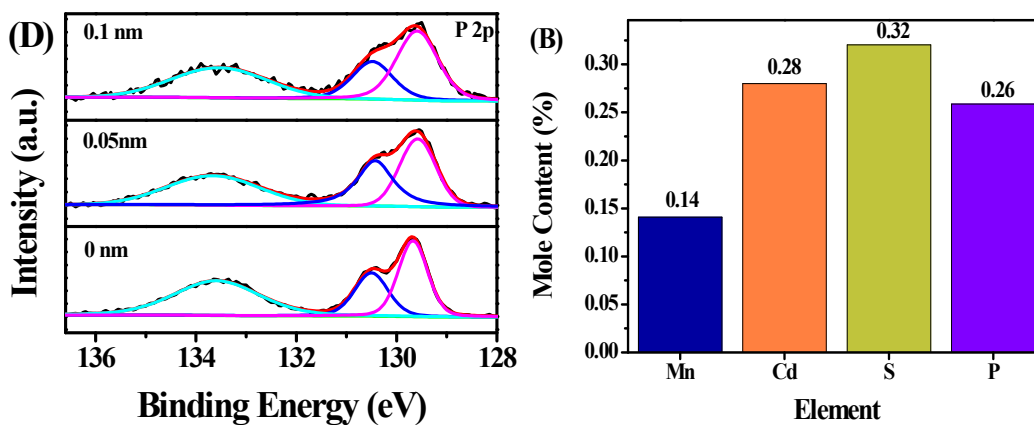

Fig. S3 (A) XPS spectra of P 2p for 0.1-P/ $Mn_{0.25}Cd_{0.75}S$  by  $Ar^+$  beam etching for 0, 0.05, 0.1 nm. (B) The content spectrum of each element in 0.1-P/ $Mn_{0.25}Cd_{0.75}S$  measured by XPS.

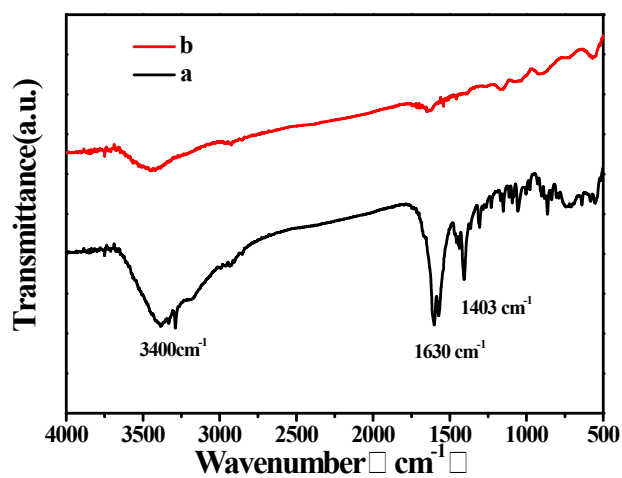

Fig. S4 FT-IR spectra of (a)  $Mn_{0.25}Cd_{0.75}S$  and (b) 0.1-P/ $Mn_{0.25}Cd_{0.75}S$

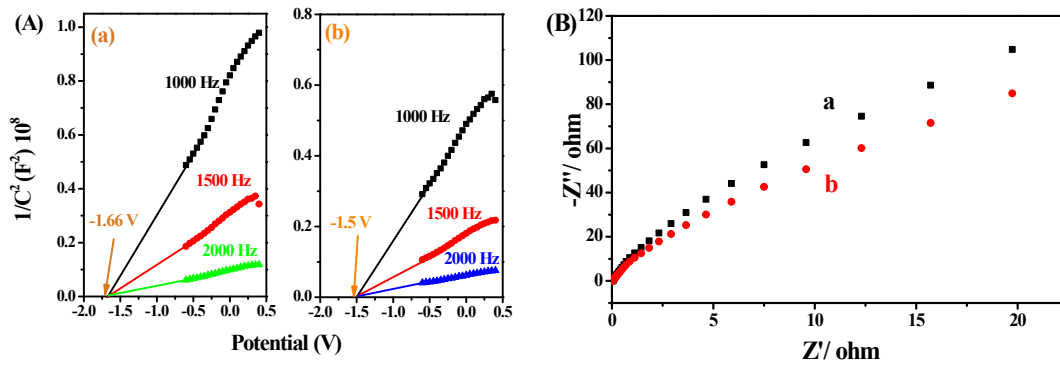

**Fig. S5** (A) The Mott-Schottky plots and (B) EIS of (a)  $\text{Mn}_{0.25}\text{Cd}_{0.75}\text{S}$  and (b)  $0.1\text{-P}/\text{Mn}_{0.25}\text{Cd}_{0.75}\text{S}$ .

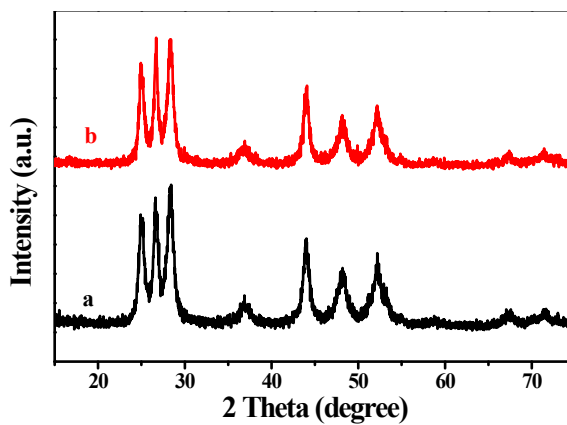

**Fig. S6** The XRD patterns of (a) fresh  $0.1\text{-P}/\text{Mn}_{0.25}\text{Cd}_{0.75}\text{S}$  and (b) used  $0.1\text{-P}/\text{Mn}_{0.25}\text{Cd}_{0.75}\text{S}$ .

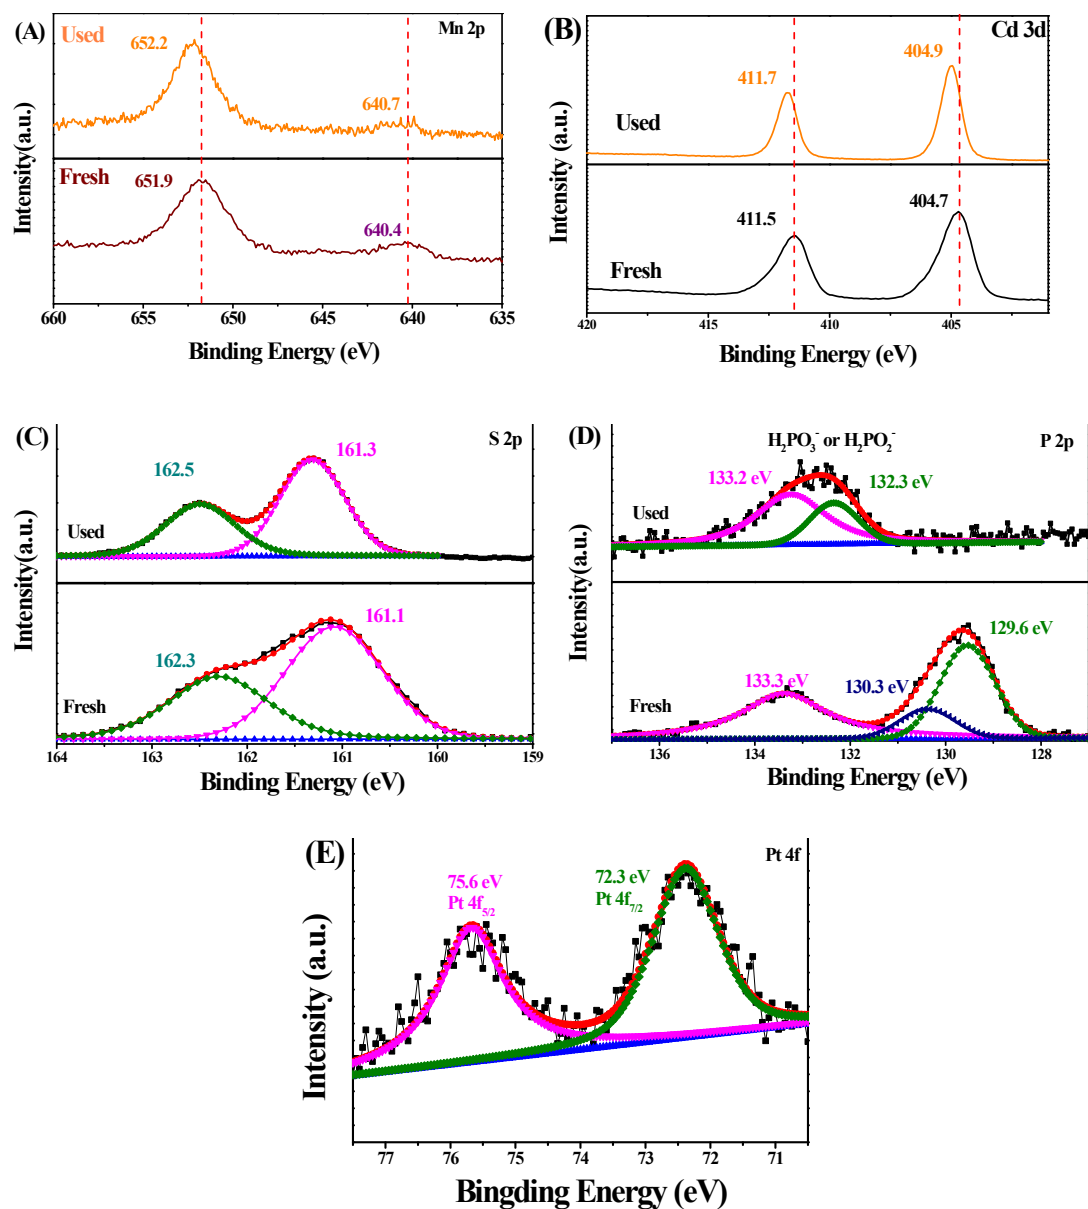

**Fig. S7** The XPS (A) Mn 2p, (B) Cd 3d, (C) S 2p, (D) P 2p patterns of fresh 0.1-P/Mn<sub>0.25</sub>Cd<sub>0.75</sub>S and used 0.1-P/Mn<sub>0.25</sub>Cd<sub>0.75</sub>S, (E) XPS Pt 4f of used 0.1-P/Mn<sub>0.25</sub>Cd<sub>0.75</sub>S

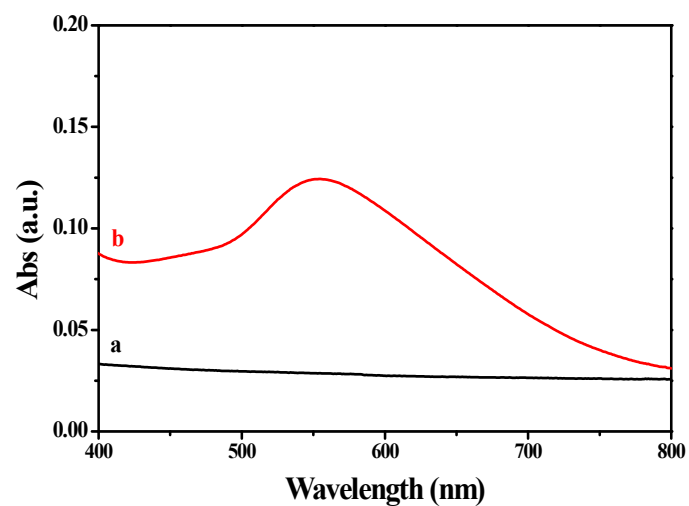

**Fig. S8** The absorption intensity of H<sub>2</sub>O<sub>2</sub> of (a) blank and (b) 0.1-P/Mn<sub>0.25</sub>Cd<sub>0.75</sub>S.

**Table S1** The content of H<sub>2</sub> and H<sub>2</sub>O<sub>2</sub>

| Product                       | Content (μmol/h) |
|-------------------------------|------------------|
| H <sub>2</sub>                | 25.89            |
| H <sub>2</sub> O <sub>2</sub> | 1.3              |



**Table S2** Comparison of photocatalytic performance of 0.1-P/Mn<sub>0.25</sub>Cd<sub>0.75</sub>S and other systems in recently reports

| Samples                                       | Light source                                   | Cocatalyst loading | Performance ( $\mu\text{molg}^{-1}\text{h}^{-1}$ )       | Reference |
|-----------------------------------------------|------------------------------------------------|--------------------|----------------------------------------------------------|-----------|
| CdS/WO <sub>3</sub> /CdWO <sub>4</sub>        | 300W Xe Lamp ( $\lambda > 420\text{nm}$ )      | 1 wt% Pt           | H <sub>2</sub> 6.896<br>O <sub>2</sub> 3.162             | [1]       |
| d-ZCS-P300                                    | 500 W Xe lamp ( $\lambda \geq 400\text{ nm}$ ) | None               | H <sub>2</sub> 32.33<br>O <sub>2</sub> 14                | [2]       |
| BiVO <sub>4</sub> /CDs/CdS(Z-scheme)          | 300 W Xe lamp ( $\lambda \geq 420\text{ nm}$ ) | 3 wt% Pt           | H <sub>2</sub> 15.5<br>O <sub>2</sub> 7.625              | [3]       |
| Ag-ZnIn <sub>2</sub> S <sub>4</sub>           | 300W Xe lamp ( $>420\text{ nm}$ )              | None               | H <sub>2</sub> 56.6<br>O <sub>2</sub> 29.1               | [4]       |
| 0.1-P/Mn <sub>0.25</sub> Cd <sub>0.75</sub> S | 300W Xe Lamp ( $\lambda > 400\text{nm}$ )      | 2 wt% Pt           | H <sub>2</sub> 863<br>H <sub>2</sub> O <sub>2</sub> 43.3 | This work |

- [1] Nagakawa, H.; Ochiai, T.; Konuma, S.; Nagata, M.; Visible-Light overall water splitting by CdS/WO<sub>3</sub>/CdWO<sub>4</sub> tricomposite photocatalyst suppressing photocorrosion. *ACS Applied Energy Materials*, 12 (2018) 6730–6735.
- [2] Ng, B. J.; Putri, L. K.; Kong, X. Y.; Pasbakhsh, P.; Chai, S.; Overall pure water splitting using one-dimensional P-doped twinned Zn<sub>0.5</sub>Cd<sub>0.5</sub>S<sub>1-x</sub> nanorods via synergetic combination of long-range ordered homojunctions and interstitial S vacancies with prolonged carrier lifetime. *Applied Catalysis B: Environmental*, 262 (2020) 118309.
- [3] Wu, X.; Zhao, J.; Wang, L.; Han, M.; Zhang, M.; Wang, H.; Huang, H.; Liu, Y.; Kang, Z.; Carbon dots as solid-state electron mediator for BiVO<sub>4</sub>/CDs/CdS Z-scheme photocatalyst working under visible light. *Applied Catalysis B: Environmental*, 206 (2017) 501-509.
- [4] Pan, R.; Hu, M.; Liu, J.; Li, D.; Wan, X.; Wang, H.; Li, Y.; Zhang, X.; Wang, X.; Jiang, J.; Zhang J.; Two-Dimensional all-in-one sulfide monolayers driving photocatalytic overall water splitting. *Nano Letters*, 14 (2021) 6228–6236.
